1 **Single-dose effectiveness of mpox vaccine in Quebec, Canada: test-negative design with and without**  
2 **adjustment for self-reported exposure risk**

3  
4 Nicholas Brousseau<sup>1,2,3\*</sup>, Sara Carazo<sup>1,3</sup>, Yossi Febriani<sup>2</sup>, Lauriane Padet<sup>1</sup>, Sandrine Hegg-Deloye<sup>2</sup>,  
5 Geneviève Cadieux<sup>4,5</sup>, Geneviève Bergeron<sup>4</sup>, Judith Fafard<sup>6</sup>, Hugues Charest<sup>6,7</sup>, Gilles Lambert<sup>4</sup>, Denis  
6 Talbot<sup>3</sup>, Jean Longtin<sup>2</sup>, Alexandre Dumont-Blais<sup>8</sup>, Steve Bastien<sup>8</sup>, Virginie Dalpé<sup>1</sup>, Pierre-Henri Minot<sup>1</sup>,  
7 Gaston De Serres<sup>1,2</sup>, Danuta M. Skowronski<sup>9,10</sup>.

8 **1** Biological Risks Department, Institut national de santé publique du Québec, Quebec, QC,  
9 Canada

10 **2** Centre Hospitalier Universitaire (CHU) de Québec–Université Laval Research Center, Quebec,  
11 QC, Canada

12 **3** Social and Preventive Medicine Department, Faculty of Medicine, Laval University, Quebec,  
13 QC, Canada

14 **4** Direction régionale de santé publique de Montréal, Montreal, QC, Canada

15 **5** Department of Epidemiology, Biostatistics and Occupational Health, McGill University,  
16 Montréal, QC, Canada

17 **6** Laboratoire de santé publique du Québec, Institut national de santé publique du Québec,  
18 Québec, QC, Canada

19 **7** Faculty of Medicine, University of Montreal, Montreal, QC, Canada

20 **8** RÉZO Community Organization, Montreal, QC Canada

21 **9** Immunization Programs and Vaccine Preventable Diseases Service, BC Centre for Disease  
22 Control, Vancouver, British Columbia, Canada

23 **10** School of Population and Public Health, University of British Columbia, Vancouver, British  
24 Columbia, Canada

25

26 **Keywords**

27 Epidemiology; immunization; monkeypox; mpox; vaccine effectiveness.

28

29 **Running title**

30 MVA-BN effectiveness against mpox

31

32 **Contact information**

33 \* Corresponding author:

34 Nicholas Brousseau, MD, MSc, FRCP(C), Biological Risks Department, Institut national de santé publique  
35 du Québec, 945 avenue Wolfe, Quebec, QC, G1V 5B3, Canada

36 [nicholas.brousseau@inspq.qc.ca](mailto:nicholas.brousseau@inspq.qc.ca)

37

#### 38 **40-word summary of the article's main point**

39 When adjusting for differential exposure risk, one vaccine dose reduced the mpox risk by about two-  
40 thirds using self-reported risk factors, but by only one-third using surrogate indicators available within  
41 administrative databases. Inadequate adjustment for exposure risk under-estimates MVA-BN vaccine  
42 effectiveness.

43

#### 44 **Number of words**

45 2992 words

46

#### 47 **Number of words (abstract)**

48 250 words

49

#### 50 **Abbreviations**

51 All-Admin, participants meeting eligibility criteria and using administrative data only; CI, confidence  
52 interval; gbMSM, gay, bisexual, and other men who have sex with men; GBTQ, gay, bisexual, trans,  
53 queer; HIV, human immunodeficiency virus; IQR, interquartile range; NA, not applicable; NAT, nucleic  
54 acid test; PNA, prefers not to answer; PrEP, pre-exposure prophylaxis; QPHL, Quebec Public Health  
55 Laboratory; STI, sexually transmitted infection; Sub-Quest; subset of All-Admin participants who  
56 completed the questionnaire; VE, vaccine effectiveness.

57

#### 58 **Abstract**

59

#### 60 **Introduction**

61 During the 2022 mpox outbreak, the province of Quebec, Canada prioritized first doses for pre-exposure  
62 vaccination of people at high mpox risk, delaying second doses due to limited supply. We estimated single-  
63 dose mpox vaccine effectiveness (VE) adjusting for virus exposure risk based only on surrogate indicators

64 available within administrative databases (e.g. clinical record of sexually transmitted infections), or  
65 supplemented by self-reported risk factor information (e.g. sexual contacts).

66

## 67 **Methods**

68 We conducted a test-negative case-control study between June 19 and September 24, 2022.

69 Information from administrative databases was supplemented by a questionnaire collecting self-  
70 reported risk factors specific to the three-week period before testing. Two study populations were  
71 assessed: all within the administrative databases (All-Admin) and the subset completing the  
72 questionnaire (Sub-Quest). Logistic regression models were adjusted for age, calendar-time and  
73 exposure-risk, the latter based on administrative indicators only (All-Admin and Sub-Quest populations)  
74 or supplemented by questionnaire information (Sub-Quest population).

75

## 76 **Results**

77 There were 532 All-Admin participants, of which 199 (37%) belonged to Sub-Quest. With exposure-risk  
78 adjustment based only on administrative indicators, single-dose mpox VE among All-Admin and Sub-  
79 Quest populations was similar at 35% (95%CI:-2-59) and 30% (95%CI:-38-64), respectively. With  
80 adjustment supplemented by questionnaire information, Sub-Quest VE increased to 65% (95%CI:1-87).  
81 Protection against severe outcomes was higher (VE=82%; 95%CI:-50-98) but with overlapping  
82 confidence intervals.

83

## 84 **Conclusions**

85 One vaccine dose reduced mpox risk by about two-thirds when adjustment incorporated self-reported  
86 risk factors, but by only one-third when adjustment relied solely upon administrative indicators.

87 Inadequate adjustment for exposure risk may substantially under-estimate mpox VE.

88

89

## 90 **Introduction**

91

92 In May 2022, an mpox (formerly known as monkeypox) outbreak started in several non-endemic countries  
93 prompting the World Health Organization (WHO) to declare a public health emergency of international  
94 concern on July 23, 2022[1]. In the city of Montréal (Province of Qubec, Canada) the first mpox cases were  
95 laboratory-confirmed on May 20, 2022. As of June 1, 2023, 79% of the 529 cases reported in Quebec were  
96 among Montreal residents. Transmission mostly occurred among communities of gay, bisexual, trans,  
97 queer (GBTQ) men and other men who have sex with men (gbMSM). Outbreak control primarily relied on  
98 surveillance, case and contact management, and pre-exposure vaccination with the Modified Vaccinia  
99 Ankara—Bavarian Nordic [MVA-BN] vaccine (Imvamune [Canada], Jynneos [USA], Imvanex [Europe]).

100

101 MVA-BN is a third-generation non-replicating vaccine, approved by Health Canada in 2020 to prevent  
102 *orthopoxvirus* infections[2]. Post-exposure MVA-BN vaccination began in Quebec on May 30, 2022 and on  
103 June 3, 2022, Quebec became one of the first jurisdictions to offer pre-exposure vaccination[3,4], with  
104 gradual roll-out first targeting gbMSM at high-risk of exposure, and progressively extended to sex workers  
105 and people working in sex-on-premise venues. The standard MVA-BN vaccination regimen consists of two  
106 subcutaneous doses, 28 days apart. Due to limited supply, providing the first MVA-BN dose to as many as  
107 possible, including to foreign visitors, was prioritized in Quebec[5] and Canada[6], thereby delaying  
108 second doses. In Quebec, the second dose was initially restricted to immunocompromised persons and  
109 became offered widely as of October 6, 2022. As of June 1, 2023, a total of 31,000 first doses and 13,000  
110 second doses had been administered in Quebec.

111

112 The efficacy of MVA-BN pre-exposure vaccination against mpox has never been demonstrated in clinical  
113 trials. Several observational studies have attempted to evaluate single-dose vaccine effectiveness (VE)  
114 against mpox disease with widely varying estimates ranging between 36%[7] and 86%[8]. Most studies,  
115 however, have relied upon administrative databases lacking specific details on exposure risk, and using  
116 surrogate indicators as proxy for mpox exposure risk. With limited vaccine doses targeted toward high-  
117 risk individuals, differential exposure risk between vaccinated and unvaccinated persons may pose a  
118 particular threat to valid VE estimation.

119

120 In this test-negative case-control study, we estimated the effectiveness of subcutaneous single-dose MVA-  
121 BN vaccination against symptomatic mpox infection, including moderate-to-severe disease. We compared  
122 mpox VE estimates with adjustment for exposure risk based solely on surrogate indicators of risk, as  
123 typically available within administrative databases, or supplemented by self-reported risk factor  
124 information specific to the three-week period before mpox testing.

125

## 126 **Methods**

127

### 128 **Design**

129 We conducted a test-negative case-control study using skin or mucous membrane specimens that were  
130 tested for *orthopoxvirus* infections by nucleic acid test (NAT) at the Quebec Public Health Laboratory  
131 (QPHL). Cases were test-positive. Controls were individuals with only negative NAT tests. Among those  
132 with multiple test-negative specimens, only the first-ever specimen for orthopoxvirus testing, collected  
133 during the study period, was used.

134

### 135 **Data sources**

#### 136 Administrative data

137 We obtained information on cases and controls from several administrative and surveillance databases.  
138 The QPHL data included all *orthopoxviruses* NAT test results, date and place of specimen collection, age,  
139 sex and human immunodeficiency virus (HIV) status (any past positive test result). Mpox vaccination  
140 data were retrieved from the Provincial Immunization Registry, a populational registry where all  
141 immunizations have to be recorded by law[9]. Information on sexually transmitted infection (STI) testing  
142 (chlamydia, gonorrhea and syphilis) was retrieved from the *Dossier Santé Québec* database containing  
143 individual clinical information, while positive STI tests were identified within the provincial notifiable  
144 disease registry.

145

146 For cases, mpox clinical data (hospitalization, complications) were also obtained from the provincial  
147 notifiable disease registry. Tecovirimat treatment information was retrieved from the only designated  
148 pharmacy allowed to distribute the medication in the province (*Centre hospitalier universitaire de*  
149 *Montréal*).

150

#### 151 Questionnaire data

152 We supplemented administrative data with self-reported sociodemographic and exposure data  
153 collected from both cases and controls using a standardized questionnaire available in French, English  
154 and Spanish. The questionnaire was adapted from tools used for public health epidemiological  
155 investigations (**Supplementary Methods**). Between January 10 and March 27, 2023, cases and controls  
156 were invited by email to complete the questionnaire on-line, with three reminders. Trained interviewers  
157 attempted to contact non-responders and those without an e-mail address by phone, with three  
158 reminders. Participation was actively promoted by the main health and STI prevention organization  
159 serving gbMSM communities in Montreal (RÉZO)[10], and \$30 financial compensation was given to  
160 participants.

161  
162 The questionnaire collected vaccination status and additional demographic and clinical information such  
163 as ethnocultural background, immunosuppression, and HIV pre-exposure prophylaxis (PrEP). When  
164 MVA-BN vaccination was not in the Immunization Registry but reported by participants with a specific  
165 date, the participant was considered vaccinated. The questionnaire specifically queried details related to  
166 mpox exposure risk during the 3 weeks before specimen collection including contact with a person with  
167 mpox symptoms, number of sexual partners, drug use before or during sexual activity, sex involving > 2  
168 people, attending sex-on-premise venues, and skin-to-skin contacts during a festive event.

### 169 170 **Study population**

171 The chosen study period spanned June 19 to September 24, 2022 (epidemiological weeks 26-38), taking  
172 into account vaccine roll-out, a 14-day lag to mount effective single-dose immunity, and epidemic  
173 evolution with cases peaking during June and July, and subsiding by mid-September 2022 (**Figure 1**).

174  
175 Eligible specimens were restricted to those collected in Montreal where most cases occurred. Since  
176 most cases were men (according to health administrative databases), we excluded women. We also  
177 excluded individuals aged <18 years, those who tested positive before the study period, those whose  
178 only specimens were blood, serum or cerebrospinal fluid samples (not indicative of a skin or mucous  
179 membrane lesion), asymptomatic individuals, and persons residing outside of the province.

180  
181 Two study populations were analyzed: (1) all participants meeting eligibility criteria and using  
182 administrative data only (All-Admin); and (2) the subset of All-Admin participants who completed the  
183 questionnaire (Sub-Quest).

184

### 185 **Vaccination status**

186 Vaccinated status was defined by receipt of a single dose of MVA-BN vaccine  $\geq 14$  days before specimen  
187 collection. Those who had not received any MVA-BN vaccine dose before specimen collection were  
188 considered unvaccinated. We excluded individuals who had received one MVA-BN dose  $< 14$  days or two  
189 doses at any time before specimen collection.

190

### 191 **Outcomes**

192 Single-dose VE was primarily assessed against any laboratory-confirmed symptomatic infection, among  
193 the All-Admin population and the Sub-Quest population separately. We also estimated VE against  
194 moderate-to-severe disease defined by mpox disease-related hospitalization, having had a complication  
195 or having received tecovirimat treatment. VE against moderate-to-severe disease could only be  
196 undertaken using the All-Admin population owing to sample size considerations. The same control  
197 group of any symptomatic but test-negative individuals was used in assessing VE for both clinical  
198 outcomes.

199

### 200 **Statistical analysis**

201 Logistic regression models compared the adjusted odds of being a case versus a control by vaccine  
202 status. VE was derived as  $(1 - \text{odds ratio } [OR_{\text{adjusted}}]) \times 100$ . Analysis was performed using SAS (version  
203 9.4).

204

205 For the All-Admin population, we adjusted models for the following variables available from linked  
206 administrative databases: age group, calendar time, surrogate indicator of exposure risk  $\leq 6$  months  
207 before the mpox test (no test for STI, only negative STI test results,  $\geq 1$  positive STI test results), and HIV  
208 status (see **Figure 3** for categories used).

209

210 For the Sub-Quest population, we compared VE based on two adjustment approaches: (1) adjusting as  
211 per above for variables available in administrative databases and (2) adjusting for variables available in  
212 administrative databases and also for information additionally available from the questionnaire:  
213 ethnocultural background, immunosuppression, HIV status/PrEP use, contact with a person who has  
214 mpox symptoms, number of sexual partners, drug use before or during sexual activity, sex involving  $> 2$   
215 people, attending sex-on-premise venues, skin-to-skin contacts during a festive event (see **Figure 3** for

216 categories used). We defaulted to the questionnaire responses for HIV status where discordant from  
217 administrative databases. There were no missing data for any variable included in the model.

218  
219 To assess possible recall bias, we compared the number of sexual partners from the notifiable disease  
220 registry recorded during public health investigation of reported cases (Summer 2022) versus  
221 questionnaire capture (Winter 2023). We also undertook four additional sensitivity analyses of VE within  
222 the Sub-Quest population, including: (1) extension of the study period to include epidemiological weeks  
223 22-24 and 39-44; (2) vaccination defined as  $\geq 21$ -days before specimen collection; (3) restriction to  
224 younger adults 18-49 years old; and (4) restriction to participants with self-reported PrEP use or HIV  
225 diagnosis.

226  
227 **Ethics**  
228 In the context of a public health emergency, this work was conducted under the legal mandate provided  
229 by the Quebec Public Health Act which allowed access to relevant administrative data[9] and was also  
230 approved by the *CHU de Québec-Université Laval* ethics committee.

231  
232 **Results**

233  
234 **Study sample**  
235 From June 19 to September 24 2022, there were 1025 individuals with a specimen submitted from  
236 Montreal for mpox NAT analysis (277 cases; 748 controls) (**Figure 2**). Among these, 448 (44%) were  
237 excluded with main reasons being: asymptomatic and tested for a research project (348/448; 78%), and  
238 woman (81/448; 18%). After applying all exclusion criteria, 532 individuals (231 cases; 301 controls)  
239 were included in the All-Admin analysis. The Sub-Quest subset who answered the questionnaire  
240 included 199 (37%) participants (91 cases; 108 controls).

241  
242 **Case and control description**  
243 Among the 532 All-Admin participants, half (116/231; 50%) NAT-positive cases were reported before  
244 mid-July whereas most (162/301; 54%) NAT-negative controls were reported later in August and  
245 September (**Table 1**). Slightly fewer cases than controls were vaccinated (26% vs. 34%, respectively).  
246 Few cases or controls were  $\geq 50$  years old (16% vs 22%). More cases than controls were HIV-positive  
247 (22% vs. 14%) or had a positive STI test in the 6 months before mpox testing (26% vs. 10%).



248

249 Results based on administrative data were similar between the All-admin and Sub-Quest participants  
250 (**Table 1**). By questionnaire, cases reported greater mpox exposure risk than controls during the 3 weeks  
251 before specimen collection including  $\geq 5$  non-regular sexual partners (19% vs. 9%, respectively) and sex  
252 involving  $> 2$  people (32% vs. 23%). Nearly all cases (88/91; 97%) but fewer controls (93/108; 86%) had  
253 at least one self-reported mpox exposure risk factor during the 3 weeks before testing. More cases were  
254 HIV-negative but taking PrEP (47%) compared to controls (33%). Our questionnaire appeared slightly  
255 more sensitive to identify HIV-positive individuals than administrative databases, as 18% of Sub-Quest  
256 participants self-reported an HIV infection, but 14% of Sub-Quest participants had HIV according to  
257 administrative (QPHL) data.

258

259 In the questionnaire (completed on average 26 weeks post-diagnosis), 10/91 (10%) Sub-Quest cases  
260 reported no sexual partners in the 3 weeks before specimen collection. In contrast, the notifiable  
261 disease registry (data collected on average two weeks post-diagnosis) indicated that all 91 Sub-Quest  
262 cases had reported sexual contact(s) during that period. There was otherwise good concordance  
263 between these two data sources with respect to the number of sexual partners reported  
264 (**Supplementary Table 1**).

265

### 266 **Single-dose MVA-BN vaccine effectiveness**

267 Single-dose MVA-BN VE estimates against symptomatic infection among All-Admin and Sub-Quest  
268 populations were 35% (95%CI: -2-59) and 30% (95%CI: -38-64), respectively, with adjustment for age,  
269 calendar time and exposure risk based only upon administrative indicators (**Figure 3, Supplementary  
270 Table 2**).

271

272 Single-dose MVA-BN VE within the Sub-Quest population increased to 65% (95%CI:1-87) when adjusting  
273 for age, calendar time and exposure risk with the latter further supplemented by questionnaire  
274 information (**Figure 3, Supplementary Table 2**). The most influential questionnaire variable was HIV  
275 PrEP use, with Sub-Quest VE of 50% (95%CI:-8-77) when only that questionnaire variable supplemented  
276 age, calendar time and administrative indicators of exposure risk. However, other questionnaire  
277 covariates (without adjusting for HIV PrEP) were also influential with VE of 45% (95%CI:-37-78) when  
278 supplemental to age, calendar time and administrative indicators of exposure risk.

279

280 There were 12/208 (6%) moderate-to-severe cases during the study period within the All-Admin  
281 population (of whom just 3 responded to the study questionnaire). Of these 12, three were hospitalized,  
282 six (two also hospitalized) experienced complications, and five received tecovirimat treatment (one also  
283 hospitalized). Only 1/12 moderate-to-severe cases (8%) had received MVA-BN vaccine compared with  
284 101/287 controls (35%) suggesting higher VE against moderate-to-severe disease (82%; 95%CI: -39, 98)  
285 **(Figure 3, Supplementary Table 2).**

286

### 287 **Sensitivity analyses**

288 Sensitivity analyses were performed on the Sub-Quest population, inclusive of questionnaire covariates.  
289 When compared with the primary analysis (VE=65%; 95%CI:1-87), VE point estimates were slightly  
290 lower, between 50-63%, when extending the study period earlier from May 29 or later to November 5,  
291 based on vaccination  $\geq 21$  days before specimen collection or when restricting to people with an HIV  
292 diagnosis or taking PrEP. VE was higher at 75% (95%CI:23-92) with restriction to adults 18-49 years  
293 **(Table 2).**

294

### 295 **Discussion**

296 One MVA-BN vaccine dose during an mpox outbreak affecting gbMSM communities in Montreal was  
297 associated with about two-thirds reduction in the risk of symptomatic mpox infection when adjustment  
298 for mpox exposure risk included self-reported risk factors. The estimated risk reduction was much lower  
299 (roughly one-third) when adjustment used only surrogate indicators of exposure risk available in  
300 administrative databases. In sensitivity analyses, VE point estimates ranged 50-75%, indicating a 2-4-fold  
301 lower mpox risk among single-dose vaccinated compared to unvaccinated individuals. Recognizing the  
302 limited sample size, our findings also suggest greater protection against moderate-to-severe disease  
303 compared to milder disease with estimated VE of about 80% corresponding to 5-fold risk reduction.

304

305 Prior MVA-BN VE studies based upon other observational designs including case-control, case-coverage  
306 and cohort approaches have reported widely ranging single-dose VE against mpox, with estimates  
307 spanning 36%[7] to  $\geq 78\%$ [7,8,11,12]. These analyses, however, were limited by the use of aggregate  
308 data only[11] and/or failure to adequately adjust for confounders such as differential exposure risk by  
309 vaccine status[7,8] and/or calendar time[8,11,12]. In addition to exposure risk adjustment, calendar-  
310 time adjustment is also important to consider in observational estimation of VE, as previously well-  
311 established for influenza and COVID-19. When the incidence of mpox decreases with time across the

312 study period and vaccinated person-time accrues later than unvaccinated person-time, VE will be over-  
313 estimated[13]. Other mpox VE investigations based on classical matched case-control designs included  
314 controls that may have not presented with mpox symptoms, with single-dose mpox VE estimates of  
315 68%[14] and 75%[15]. These estimates are slightly higher than our own, which was based instead on a  
316 test-negative design that simultaneously standardized for healthcare seeking and testing indication, in  
317 addition to controlling for exposure risk and calendar time.

318  
319 The lower single-dose VE estimates previously reported by Deputy et al.[7] (36%) is similar to our single-  
320 dose VE estimate among our All-Admin (35%) and Sub-Quest (30%) participants before incorporating  
321 self-reported risk factors into covariate adjustment within the Sub-Quest population. Of note, the  
322 comparability between our All-Admin and Sub-Quest populations when adjusting for the same  
323 covariates is partially reassuring against selection bias potentially influencing the subset completing the  
324 study questionnaire. The Deputy et al. results were based on a large case-control study applied to a  
325 nationwide electronic health record database, matching cases and controls  $\geq 18$  years with incident  
326 diagnosis of HIV infection or an order for PrEP based upon week of the index event. In our study,  
327 additionally adjusting for HIV PrEP alone had the greatest impact on VE (50%), but adjustment for other  
328 self-reported risk factors further increased our overall single-dose VE estimate (65%). This insight was  
329 achieved through actively contacting and querying cases and controls to document mpox exposure risk,  
330 an added step not typically undertaken for controls. When we restricted our Sub-Quest population to  
331 people taking PrEP or with an HIV diagnosis, our single-dose VE estimate (50%) was still higher, but  
332 closer to that of Deputy et al.[7] That further stratification, however, was accompanied by reduced  
333 sample size and wide confidence intervals. More research is needed to determine if restricting to people  
334 taking HIV PrEP or adjusting for this variable as a surrogate indicator within administrative databases  
335 could support valid VE estimation if/when self-reported mpox exposure risk cannot otherwise be  
336 adequately documented[16].

337  
338 Our finding of higher single-dose VE against moderate-to-severe disease was based on a single  
339 hospitalized vaccinated case, lacking statistical power but nevertheless consistent with immunogenicity  
340 studies. While two MVA-BN doses in non-primed individuals induced low levels of poorly neutralizing  
341 antibody[17], a single dose induced robust T-cell responses[18,19], with the latter more strongly  
342 correlated with protection against severe outcomes in general (e.g. against COVID-19 disease[20]).  
343 Other indirect evidence includes a cases series of mpox cases (without controls) in the United States by

344 Farrar et al.[21] that could not derive VE estimates, but found a lower proportion of 1-dose vaccinated  
345 (2.1%) versus unvaccinated (7.5%) cases that were hospitalized. While severe mpox fortunately remains  
346 infrequent, more definitive VE evaluation against that outcome will require much larger sample size.

347

348 This study has several limitations. The main limitation was the small sample size attributable to the  
349 contained outbreak and participation rate to the questionnaire which limited our capacity to undertake  
350 further stratified analyses (e.g., to assess waning with time). Although we standardized for being  
351 symptomatic at the time of testing, controls may not have had symptoms of similar severity to  
352 cases[22]. We can expect some level of recall bias with our questionnaire, as there was imperfect  
353 agreement between information (e.g. sexual contacts) collected on average within two-weeks (case  
354 investigation) versus 26 weeks (study questionnaire) after the diagnosis. Our questionnaire still enabled  
355 us to adjust for self-reported mpox exposure risk, including variables less likely to be affected by recall  
356 bias, such as HIV PrEP. We cannot rule out residual confounding due to unmeasured factors. Finally, we  
357 provide evidence for single-dose protection delivered through subcutaneous injection but cannot  
358 comment on other injection route or schedules (e.g. intradermal or two-dose). Other studies that have  
359 evaluated two doses show improved VE[7,11,14,15], underscoring that a complete series remains  
360 preferable when supply is sufficient.

361

362 In conclusion, during the 2022 mpox outbreak in Quebec, single-dose MVA-BN vaccine recipients were  
363 at 2-4-fold lower risk of symptomatic mpox disease compared to unvaccinated individuals and vaccine  
364 protection may be higher against severe outcomes. Incomplete adjustment for mpox exposure risk,  
365 details of which are generally not available in administrative databases, may substantially under-  
366 estimate mpox VE. In the context of MVA-BN scarcity and substantial single-dose protection, prioritizing  
367 first doses and delaying second dose delivery can maximise benefit to the targeted population.

368

### 369 **Funding**

370

371 This work was supported by the Ministry of Health and Social Services. DT is supported by a research  
372 career award from the Fonds de recherche du Québec – Santé.

373

### 374 **Acknowledgements**

375

376 We first want to thank all participants who answered the questionnaire. We also thank RÉZO  
377 community, an organization for health and STIs prevention aimed at LGBTQ men and other MSM, for  
378 their help and expertise support throughout the project, and ensuring that the project would be well  
379 received by involved communities and answer their questions. We also thank Paul Le Guerrier and  
380 Robert Allard for their collaboration on the study design. We finally thank Eveline Toth, Hélène Venables  
381 and Annick Des Cormiers for their collaboration, and Christiane Audet, Charles Bellavance, Lucie Ferland,  
382 Sophie Grenier, Gabrielle Guilbault, Sarah Shakibaian, and Maud Vallée for their help with data  
383 collection and data extraction.

384  
385 All authors participated in research design. N.B, S.C, L.P., S.H.G., J.F., and H.C. participated in the  
386 acquisition of the data. N.B, S.C, Y.F., S.H.G., D.T., G.D.S., and D.M.S. contributed to data analysis. N.B.  
387 wrote the first draft of the manuscript and all authors participated in the interpretation of data and  
388 reviewed the article.

389

#### 390 **Potential conflicts of interest**

391

392 None

393

#### 394 **References**

- 395 1. World Health Organization. WHO Director-General declares the ongoing monkeypox outbreak a  
396 Public Health Emergency of International Concern. 2022. Available at:  
397 [https://www.who.int/europe/news/item/23-07-2022-who-director-general-declares-the-ongoing-](https://www.who.int/europe/news/item/23-07-2022-who-director-general-declares-the-ongoing-monkeypox-outbreak-a-public-health-event-of-international-concern)  
398 [monkeypox-outbreak-a-public-health-event-of-international-concern](https://www.who.int/europe/news/item/23-07-2022-who-director-general-declares-the-ongoing-monkeypox-outbreak-a-public-health-event-of-international-concern). Accessed 06 July 2023.
- 399 2. Bavarian Nordic. IMVAMUNE®. 2020. Available at: [https://pdf.hres.ca/dpd\\_pm/00058622.PDF](https://pdf.hres.ca/dpd_pm/00058622.PDF).  
400 Accessed 06 July 2023.
- 401 3. Harrison LB, Bergeron G, Cadieux G, et al. Monkeypox in Montréal: Epidemiology, Phylogenomics,  
402 and Public Health Response to a Large North American Outbreak. *Ann Intern Med* **2023**; 176:67–  
403 76.
- 404 4. Poland GA, Kennedy RB, Tosh PK. Prevention of monkeypox with vaccines: a rapid review. *The*  
405 *Lancet Infectious Diseases* **2022**; 22:e349–e358.

- 406 5. Comité sur l'immunisation du Québec. Vaccination contre la variole simienne, version 3.0. 2022.  
407 Available at: <https://www.inspq.qc.ca/publications/2867>. Accessed 06 July 2023.
- 408 6. Government of Canada. NACI Rapid Response: Updated interim guidance on Imvamune in the  
409 context of ongoing monkeypox outbreaks. 2022. Available at: <https://www.canada.ca/en/public-health/services/publications/vaccines-immunization/rapid-response-updated-interim-guidance-immvamune-monkeypox-outbreaks.html>. Accessed 06 July 2023.
- 412 7. Deputy NP, Deckert J, Chard AN, et al. Vaccine Effectiveness of JYNNEOS against Mpox Disease in  
413 the United States. *N Engl J Med* **2023**; :NEJMoa2215201.
- 414 8. Sagy Y, Zucker R, Hammerman A, et al. Real-world effectiveness of a single dose of mpox vaccine in  
415 males. *Nat Med* **2023**; 29:748–752.
- 416 9. LegisQuébec. Public Health Act. 2023. Available at:  
417 <https://www.legisquebec.gouv.qc.ca/en/document/cs/S-2.2?&cible>. Accessed 06 July 2023.
- 418 10. Institut national de santé publique du Québec. L'INSPQ mène une étude novatrice sur l'efficacité  
419 du vaccin contre la variole simienne. 2023. Available at: <https://www.inspq.qc.ca/nouvelles/l-inspq-mene-etude-novatrice-sur-l-efficacite-du-vaccin-contre-variole-simienne>. Accessed 06 July  
420 2023.  
421
- 422 11. Payne AB, Ray LC, Cole MM, et al. Reduced Risk for Mpox After Receipt of 1 or 2 Doses of JYNNEOS  
423 Vaccine Compared with Risk Among Unvaccinated Persons — 43 U.S. Jurisdictions, July 31–  
424 October 1, 2022. *MMWR Morb Mortal Wkly Rep* **2022**; 71:1560–1564.
- 425 12. Bertran M, Andrews N, Davison C, et al. Effectiveness of one dose of MVA–BN smallpox vaccine  
426 against mpox in England using the case-coverage method: an observational study. *The Lancet Infectious Diseases* **2023**; :S1473309923000579.
- 428 13. Boyer CB, Lipsitch M. Alternative analysis of mpox vaccine effectiveness data from Israel. *MedRxiv*  
429 <https://doi.org/10.1101/2023.02.22.23286243> [Pre-print]. Jun 26, 2023 [cited 2023 July 09]. Available  
430 at: <http://medrxiv.org/lookup/doi/10.1101/2023.02.22.23286243>.
- 431 14. Rosenberg ES, Dorabawila V, Hart-Malloy R, et al. Effectiveness of JYNNEOS Vaccine Against  
432 Diagnosed Mpox Infection — New York, 2022. *MMWR Morb Mortal Wkly Rep* **2023**; 72:559–563.

- 433 15. Dalton AF, Diallo AO, Chard AN, et al. Estimated Effectiveness of JYNNEOS Vaccine in Preventing  
434 Mpox: A Multijurisdictional Case-Control Study — United States, August 19, 2022–March 31, 2023.  
435 MMWR Morb Mortal Wkly Rep **2023**; 72:553–558.
- 436 16. Fontán-Vela M, Hernando V, Olmedo C, et al. Reduction in the risk of mpox infection after MVA-BN  
437 vaccination in individuals on HIV pre-exposure prophylaxis: a Spanish cohort study. MedRxiv  
438 <https://doi.org/10.1101/2023.05.30.23290712> [Pre-print]. June 1, 2023 [cited 2023 July 09]. Available  
439 at: <http://medrxiv.org/lookup/doi/10.1101/2023.05.30.23290712>.
- 440 17. Zaeck LM, Lamers MM, Verstrepen BE, et al. Low levels of monkeypox virus-neutralizing antibodies  
441 after MVA-BN vaccination in healthy individuals. Nat Med **2023**; 29:270–278.
- 442 18. Cohn H, Bloom N, Cai G, et al. Mpox vaccine and infection-driven human immune signatures.  
443 MedRxiv <https://doi.org/10.1101/2023.03.07.23286701> [Pre-print]. March 9, 2023 [cited July 2023 July  
444 09]. Available at: <http://medrxiv.org/lookup/doi/10.1101/2023.03.07.23286701>. Accessed 06 July  
445 2023.
- 446 19. Sammartino JC, Cassaniti I, Ferrari A, et al. Characterization of immune response against  
447 monkeypox virus in cohorts of infected patients, historic and newly vaccinated subjects. Journal of  
448 Medical Virology **2023**; 95:e28778.
- 449 20. Fujii S, Yamasaki S, Iyoda T, Shimizu K. Association of cellular immunity with severity of COVID-19  
450 from the perspective of antigen-specific memory T cell responses and cross-reactivity. Inflamm  
451 Regen **2022**; 42:50.
- 452 21. Farrar JL, Lewis NM, Houck K, et al. Demographic and Clinical Characteristics of Mpox in Persons  
453 Who Had Previously Received 1 Dose of JYNNEOS Vaccine and in Unvaccinated Persons — 29 U.S.  
454 Jurisdictions, May 22–September 3, 2022. MMWR Morb Mortal Wkly Rep **2022**; 71:1610–1615.
- 455 22. Chua H, Feng S, Lewnard JA, et al. The Use of Test-negative Controls to Monitor Vaccine  
456 Effectiveness: A Systematic Review of Methodology. Epidemiology **2020**; 31:43–64.
- 457

458 **Table 1. Characteristics of cases and controls among All-Admin and Sub-Quest populations, June 19 to**  
 459 **September 24, 2022**

|                                                             | All-Admin population<br>(n=532) |                   | Sub-Quest population<br>(n=199) |                   |
|-------------------------------------------------------------|---------------------------------|-------------------|---------------------------------|-------------------|
|                                                             | Cases<br>N (%)                  | Controls<br>N (%) | Cases<br>N (%)                  | Controls<br>N (%) |
| <b>Overall</b>                                              | 231                             | 301               | 91                              | 108               |
| <b>ADMINISTRATIVE DATABASE VARIABLES</b>                    |                                 |                   |                                 |                   |
| <b>Age (years)</b>                                          |                                 |                   |                                 |                   |
| 18-29                                                       | 50 (22)                         | 90 (30)           | 21 (23)                         | 28 (26)           |
| 30-49                                                       | 143 (62)                        | 146 (49)          | 57 (63)                         | 55 (51)           |
| 50+                                                         | 38 (16)                         | 65 (22)           | 13 (14)                         | 25 (23)           |
| <b>Epidemiological week of specimen collection</b>          |                                 |                   |                                 |                   |
| 25-28 (June 19 - July 16)                                   | 116 (50)                        | 68 (23)           | 44 (48)                         | 26 (24)           |
| 29-31 (July 17 - August 6)                                  | 53 (23)                         | 71 (24)           | 21 (23)                         | 26 (24)           |
| 32-34 (August 7 - August 27)                                | 39 (17)                         | 90 (30)           | 15 (16)                         | 27 (25)           |
| 35-38 (August 28 - September 24)                            | 23 (10)                         | 72 (24)           | 11 (12)                         | 29 (27)           |
| <b>Days between symptom onset and testing (median; IQR)</b> | 6 (4 - 9) <sup>a</sup>          | NA                | 6 (4 - 8) <sup>a</sup>          | NA                |
| <b>Vaccination status</b>                                   |                                 |                   |                                 |                   |
| Unvaccinated                                                | 172 (74)                        | 199 (66)          | 57 (66)                         | 55 (51)           |
| 1 dose ≥14 days before testing                              | 59 (26)                         | 102 (34)          | 34 (37)                         | 53 (49)           |
| 1 dose ≥21 days before testing                              | 52 (23)                         | 94 (31)           | 30 (33)                         | 47 (47)           |
| <b>HIV infection (QPHL data)</b>                            | 51 (22)                         | 42 (14)           | 15 (16)                         | 13 (12)           |
| <b>Test done for chlamydia OR gonorrhea<sup>b</sup></b>     | 188 (81)                        | 199 (66)          | 76 (84)                         | 81 (75)           |
| <b>Test done for syphilis<sup>b</sup></b>                   | 183 (79)                        | 202 (67)          | 74 (81)                         | 78 (72)           |
| <b>Positive test for chlamydia<sup>b</sup></b>              | 36 (16)                         | 11 (4)            | 16 (18)                         | <5 (<5)           |
| <b>Positive test for gonorrhea<sup>b</sup></b>              | 39 (17)                         | 20 (7)            | 17 (19)                         | 11 (10)           |
| <b>Positive test for primary syphilis<sup>b</sup></b>       | <5 (<5)                         | <5 (<5)           | <5 (<5)                         | <5 (<5)           |
| <b>Overall: tests for STI<sup>b</sup></b>                   |                                 |                   |                                 |                   |
| No test for STI                                             | 39 (17)                         | 90 (30)           | 13 (14)                         | 24 (22)           |
| ≥ 1 test for STI, no positive results                       | 132 (57)                        | 181 (60)          | 53 (58)                         | 71 (66)           |
| ≥ 1 positive STI test results                               | 60 (26)                         | 30 (10)           | 25 (27)                         | 13 (12)           |
| <b>QUESTIONNAIRE-ELICITED VARIABLES</b>                     |                                 |                   |                                 |                   |
| <b>Gender</b>                                               |                                 |                   |                                 |                   |
| Man                                                         | NA                              | NA                | 90 (99)                         | 103 (95)          |
| Other (woman, non-binary, PNA)                              | NA                              | NA                | <5 (<5)                         | 5 (5)             |
| <b>Ethnocultural background</b>                             |                                 |                   |                                 |                   |
| French Canadian                                             | NA                              | NA                | 40 (44)                         | 56 (52)           |
| English Canadian                                            | NA                              | NA                | 5 (5)                           | 8 (7)             |
| Other, do not know, PNA                                     | NA                              | NA                | 46 (51)                         | 44 (41)           |



|                                                                                      |    |    |         |         |
|--------------------------------------------------------------------------------------|----|----|---------|---------|
| <b>Immunosuppression (excluding HIV)</b>                                             | NA | NA | 7 (8)   | <5 (<5) |
| <b>HIV infection/PrEP use (study questionnaire)</b>                                  |    |    |         |         |
| HIV infection                                                                        | NA | NA | 21 (23) | 15 (14) |
| No HIV infection, PrEP use                                                           | NA | NA | 43 (47) | 36 (33) |
| No HIV infection, no PrEP                                                            | NA | NA | 27 (30) | 57 (53) |
| <b>Skin-to-skin contact with person with mpox symptoms<sup>c</sup></b>               | NA | NA | 39 (43) | 14 (13) |
| <b>Number of sexual partners<sup>c</sup></b>                                         |    |    |         |         |
| None                                                                                 | NA | NA | 10 (11) | 27 (25) |
| Only regular partner(s)                                                              | NA | NA | 9 (10)  | 15 (14) |
| 1-2 non-regular partners                                                             | NA | NA | 28 (31) | 27 (25) |
| 3-4 non-regular partners                                                             | NA | NA | 11 (12) | 20 (19) |
| 5 or more non-regular partners                                                       | NA | NA | 17 (19) | 10 (9)  |
| Do not know, PNA                                                                     | NA | NA | 16 (18) | 9 (8)   |
| <b>Use of drugs before/during sexual activity<sup>c</sup></b>                        | NA | NA | 32 (35) | 35 (32) |
| <b>Sex involving &gt; 2 people<sup>c</sup></b>                                       | NA | NA | 29 (32) | 25 (23) |
| <b>Attended sex-on-premise venues<sup>c</sup></b>                                    | NA | NA | 36 (40) | 29 (27) |
| <b>Skin-to-skin contact (with or without sex) during a festive event<sup>c</sup></b> | NA | NA | 34 (37) | 36 (33) |
| <b>Overall: at least one exposure<sup>c</sup></b>                                    | NA | NA | 88 (97) | 93 (86) |

460 All-Admin population includes all participants with administrative data. Sub-Quest population includes  
 461 only the subset of All-Admin that completed the questionnaire. Cells sizes <5 hidden for privacy reasons.  
 462 Abbreviations: HIV, human immunodeficiency virus; IQR, interquartile range; NA, not applicable; PNA,  
 463 prefers not to answer; PrEP, pre-exposure prophylaxis; QPHL, Quebec Public Health Laboratory; STI,  
 464 sexually transmitted infection.  
 465 <sup>a</sup> Twenty-one missing data in the All-Admin population; four missing data in the Sub-Quest population.  
 466 <sup>b</sup> ≤ 6 months before mpox specimen collection.  
 467 <sup>c</sup> All self-reported exposures within 3 weeks of mpox specimen collection.  
 468

469 **Table 2. Sensitivity analyses of single-dose MVA-BN vaccine effectiveness against symptomatic**  
 470 **mpox infection, Sub-Quest population inclusive of questionnaire covariates**  
 471

|                                                                                                                        | Cases<br>N (%) | Controls<br>N (%) | Adjusted <sup>a</sup> VE<br>(95% CI) |
|------------------------------------------------------------------------------------------------------------------------|----------------|-------------------|--------------------------------------|
| <b>Primary Sub-Quest analysis (June 19-September 24, 2022: epidemiological weeks 25-38)</b>                            |                |                   |                                      |
| Unvaccinated                                                                                                           | 57 (63)        | 55 (51)           | Ref.                                 |
| Single-dose vaccinated ≥14 days                                                                                        | 34 (37)        | 52 (49)           | 65 (1, 87)                           |
| <b>Sensitivity analyses: extended study period (May 29-September 24, 2022: epi weeks 22-38)<sup>b</sup></b>            |                |                   |                                      |
| Unvaccinated                                                                                                           | 83 (70)        | 71 (57)           | Ref.                                 |
| Single-dose vaccinated ≥14 days                                                                                        | 35 (30)        | 53 (43)           | 55 (-16, 83)                         |
| <b>Sensitivity analyses: extended study period (June 19-November 5, 2022: epidemiological weeks 25-44)<sup>c</sup></b> |                |                   |                                      |
| Unvaccinated                                                                                                           | 57 (62)        | 60 (49)           | Ref.                                 |
| Single-dose vaccinated ≥14 days                                                                                        | 35 (38)        | 63 (51)           | 63 (0, 87)                           |
| <b>Sensitivity analyses: extended study period (May 29-November 5, 2022: epidemiological weeks 22-44)<sup>d</sup></b>  |                |                   |                                      |
| Unvaccinated                                                                                                           | 83 (70)        | 76 (55)           | Ref.                                 |
| Single-dose vaccinated ≥14 days                                                                                        | 36 (30)        | 63 (45)           | 54 (-18, 82)                         |
| <b>Sensitivity analyses: vaccinated ≥21 days before specimen collection</b>                                            |                |                   |                                      |
| Unvaccinated                                                                                                           | 57 (66)        | 55 (54)           | Ref.                                 |
| Single-dose vaccinated ≥21 days                                                                                        | 30 (34)        | 47 (46)           | 52 (-45, 84)                         |
| <b>Sensitivity analyses: Restricted to persons 18-49 years old<sup>e</sup></b>                                         |                |                   |                                      |
| Unvaccinated                                                                                                           | 51 (65)        | 44 (53)           | Ref.                                 |
| Single-dose vaccinated ≥14 days                                                                                        | 27 (35)        | 39 (47)           | 75 (23, 92)                          |
| <b>Sensitivity analyses: Restricted to persons with HIV diagnosis or taking PrEP<sup>f</sup></b>                       |                |                   |                                      |
| Unvaccinated                                                                                                           | 35 (55)        | 17 (33)           | Ref.                                 |
| Single-dose vaccinated ≥14 days                                                                                        | 29 (42)        | 34 (67)           | 50 (-71, 85)                         |

472 Abbreviations: HIV, human immunodeficiency virus; PNA, prefers not to answer; PrEP, pre-exposure  
 473 prophylaxis; Ref., Reference; STI, sexually transmitted infection; Sub-Quest, subset population  
 474 completing the questionnaire; VE, vaccine effectiveness.

475 <sup>a</sup> Unless otherwise specified, Sub-Quest sensitivity models adjusted for age (18-29, 30-49, 50+ years),  
 476 calendar time (epidemiological weeks 25-28, 29-31, 32-34, and 35-38), STI tests and diagnosis (no test  
 477 for STI, only negative STI test results, ≥ 1 positive STI test results), ethnocultural background (French  
 478 Canadian, English Canadian, other/do not know/PNA), immunosuppression (yes/no), HIV status/PrEP  
 479 use according to questionnaire (HIV infection, no HIV infection without PrEP, no HIV infection with  
 480 PrEP), contact with a person who has mpox symptoms (yes, no, do not know/PNA), number of sexual  
 481 partners (0, only regular partners, 1-2 non-regular, 3-4 non-regular, 5+ non-regular, do not know/PNA),  
 482 drug use before or during sexual activity (yes, no, do not know/PNA), sex involving > 2 people (yes, no,

483 do not know/PNA), attending sex-on-premise venues (yes, no, do not know/PNA), skin-to-skin contacts  
484 during a festive event (yes, no, do not know).

485 <sup>b</sup> Adjusted as per footnote <sup>a</sup> but with calendar time adjustment modified to additionally include  
486 epidemiological weeks 22-24.

487 <sup>c</sup> Adjusted as per footnote <sup>a</sup> but with calendar time adjustment modified to additionally include  
488 epidemiological weeks 39-44.

489 <sup>d</sup> Adjusted as per footnote <sup>a</sup> but with calendar time adjustment modified to additionally include  
490 epidemiological weeks 22-24 and 39-44.

491 <sup>e</sup> Adjusted as per footnote <sup>a</sup> but with age adjustment modified to 18-29 and 30-49 years. Categories "Do  
492 not know" and "PNA" were grouped with the category "Yes" for the following variables: drug use before  
493 or during sexual activity, sex involving > 2 people, attending sex-on-premises venues, skin-to-skin  
494 contacts during a festive event.

495 <sup>f</sup> Adjusted as per footnote <sup>a</sup> with the exception of immunosuppression. Categories for HIV status/PrEP  
496 use: HIV infection, no HIV infection with PrEP. Categories "Do not know" and "PNA" were grouped with  
497 the category "Yes" for the following variables: drug use before or during sexual activity, sex involving > 2  
498 people, attending sex-on-premises venues, skin-to-skin contacts during a festive event.

499

500 **Figure legends**

501

502 **Figure 1. Weekly distribution of study cases and vaccine administration in the province of Quebec,**

503 **May 22 to October 29, 2022.**

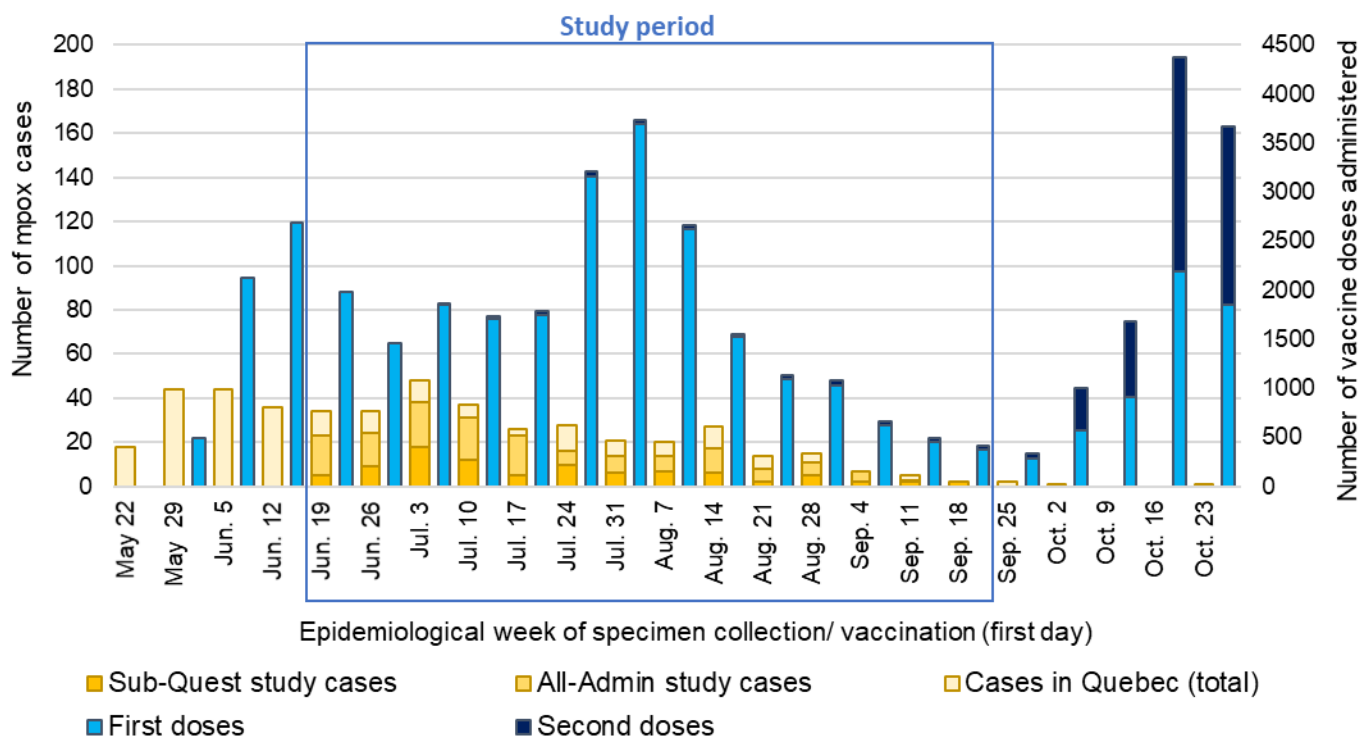

504

505 All-Admin population includes all participants with administrative data. Sub-Quest population includes  
 506 only the subset of All-Admin that completed the questionnaire. The figure only includes positive NAT  
 507 tests for *Orthopoxviruses* at QPHL. QPHL started to test samples on May 26, 2022, but this included  
 508 individuals with specimen collection earlier than May 26 due to delay between specimen collection and  
 509 testing. Before May 26, tests were conducted at the National Microbiology Laboratory in Winnipeg,  
 510 Canada.

511 Abbreviations: NAT, nucleic acid amplification test; QPHL, Quebec Public Health Laboratory.

512

513

514 **Figure 2. Flowchart of study population**

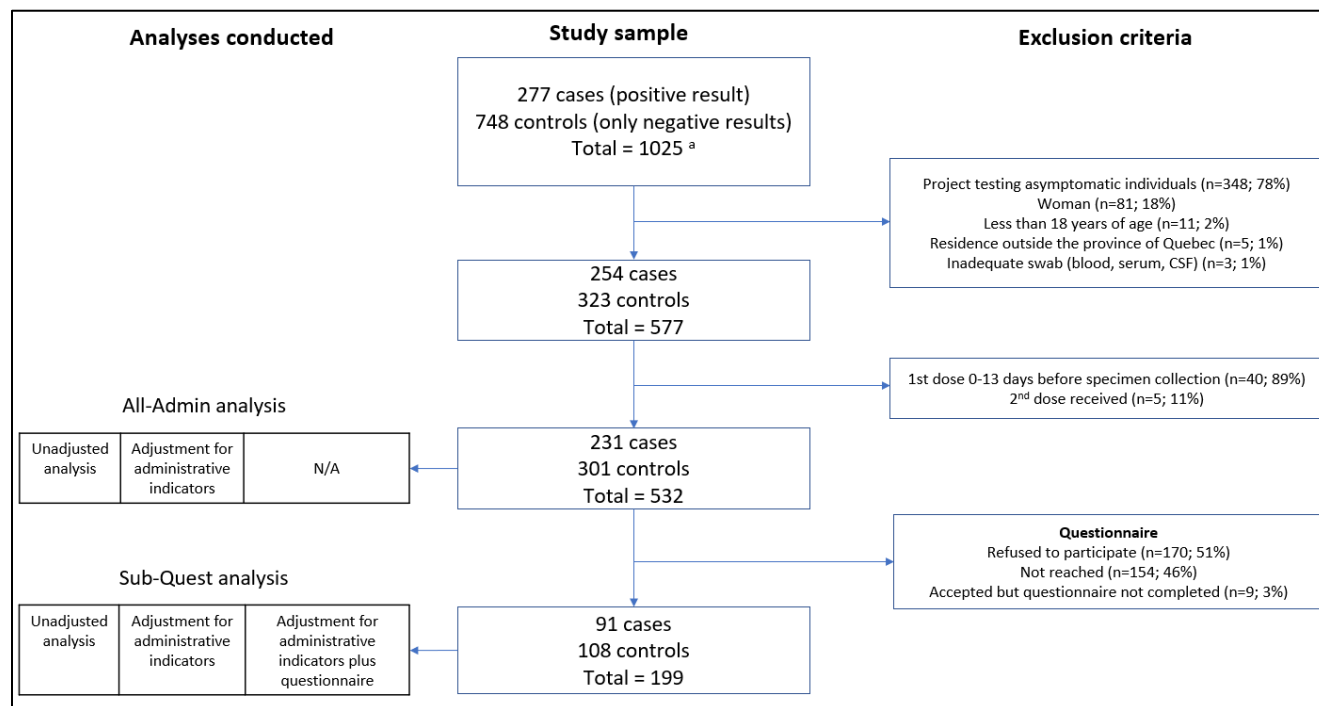

515  
 516 All-Admin population includes all participants with administrative data (n=532). Sub-Quest population  
 517 includes only the subset of All-Admin that completed the questionnaire (n=199).

518 Abbreviations: CSF, cerebrospinal fluid; QPHL, Quebec Public Health Laboratory.

519 <sup>a</sup> 1025 people with specimen collected in Montreal between June 19, 2022 and September 24, 2022.

520

521 **Figure 3. Single-dose MVA-BN vaccine effectiveness against mpox infection by study population (All-**  
 522 **Admin or Sub-Quest), exposure risk adjustment (administrative indicators only or supplemented by**  
 523 **questionnaire) and clinical profile (any symptomatic or moderate-severe disease)**

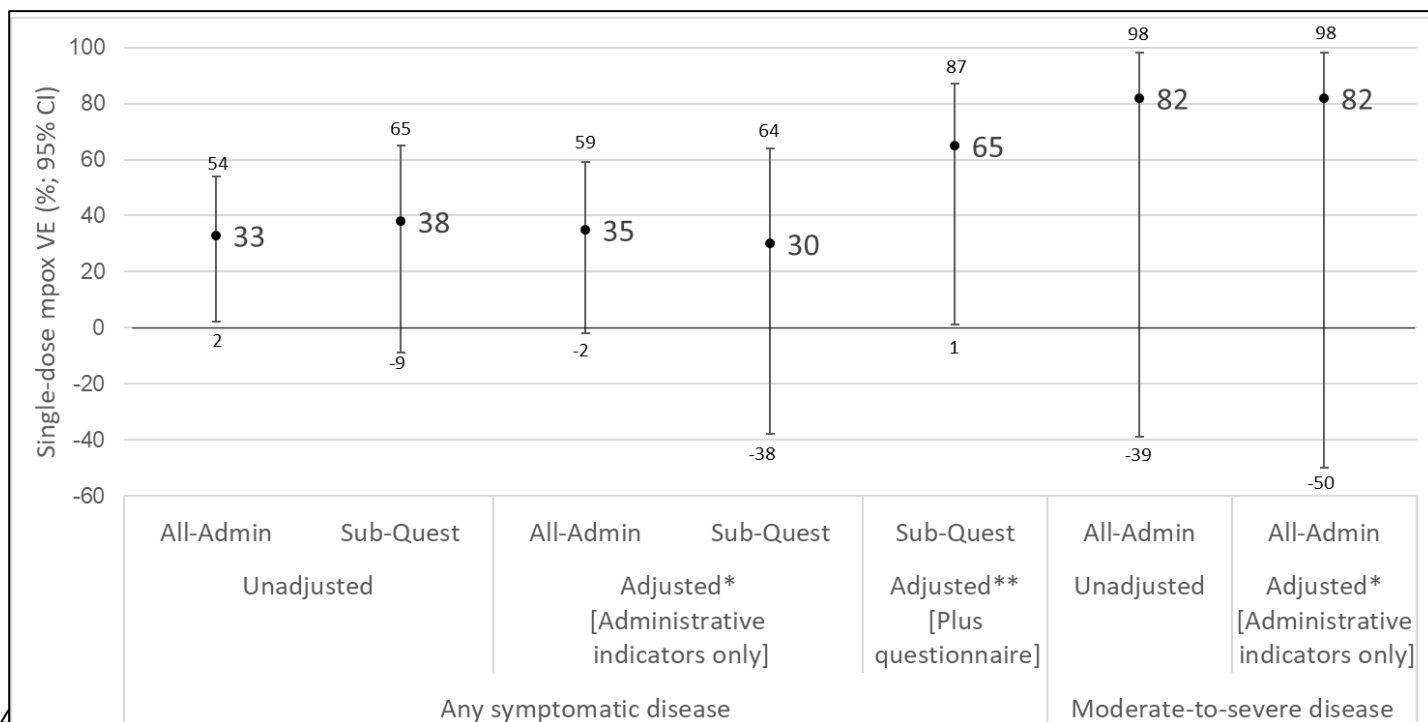

524  
 525 All-Admin population includes all participants with administrative data (n=532). Sub-Quest population includes only the subset  
 526 of All-Admin that completed the questionnaire (n=199). Moderate-to-severe disease defined by hospitalization because of  
 527 mpox disease or having had a complication or having received tecovirimat treatment. VE against moderate-to-severe disease  
 528 could only be undertaken using the All-Admin population owing to sample size considerations.

529 Abbreviations: HIV, human immunodeficiency virus; PNA, prefers not to answer, PrEP, pre-exposure prophylaxis; STI, sexually  
 530 transmitted infection.

531 \*Adjusted for age (18-29, 30-49, 50+ years), calendar time (epidemiological weeks 25-28, 29-31, 32-34, and 35-38), STI tests  
 532 and diagnosis (no test for STI, only negative STI test results, ≥ 1 positive STI test results), HIV status according to QPHL data (yes,  
 533 no).

534 \*\*Adjusted for age (18-29, 30-49, 50+ years), calendar time (epidemiological weeks 25-28, 29-31, 32-34, and 35-38), STI tests  
 535 and diagnosis (no test for STI, only negative STI test results, ≥ 1 positive STI test results), ethnocultural background (French  
 536 Canadian, English Canadian, other/do not know/PNA), immunosuppression (yes/no), HIV status/PrEP use according to  
 537 questionnaire (HIV infection, no HIV infection without PrEP, no HIV infection with PrEP), contact with a person who has mpox  
 538 symptoms (yes, no, do not know/PNA), number of sexual partners (0, only regular partners, 1-2 non-regular, 3-4 non-regular, 5+  
 539 non-regular, do not know/PNA), drug use before or during sexual activity (yes, no, do not know/PNA), sex involving > 2 people  
 540 (yes, no, do not know/PNA), attending sex-on-premise venues (yes, no, do not know/PNA), skin-to-skin contacts during a festive  
 541 event (yes, no, do not know).

542
